# Supplementary material
Source: PubMed Central journal article supplement (PMC2625302)
Supplement: NIHMS57881-supplement-Supplementary.pdf [file NIHMS57881-supplement-Supplementary.pdf]

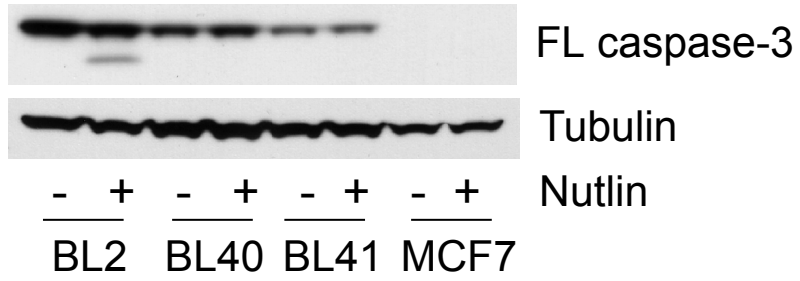

Wade et al  
Supplementary Figure 1 Caspase 3 expression in BL cells

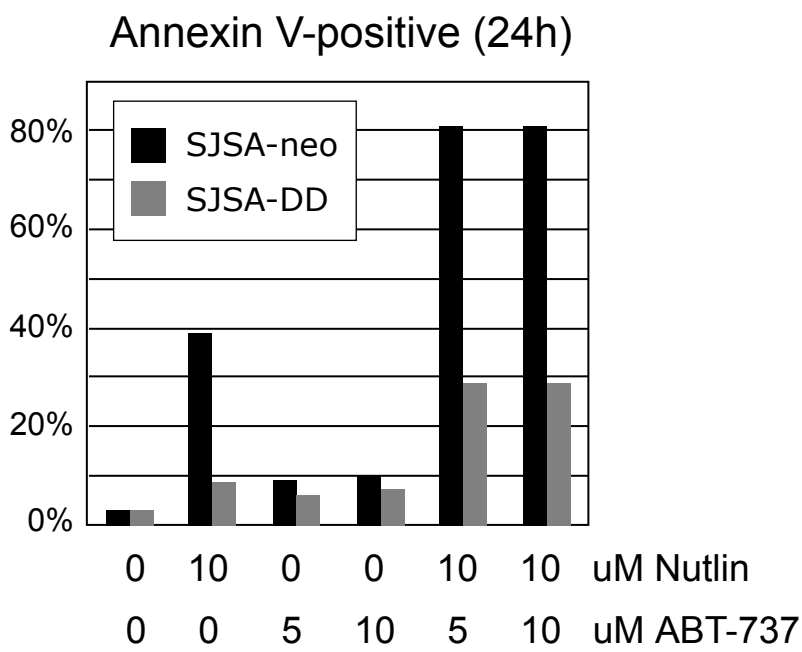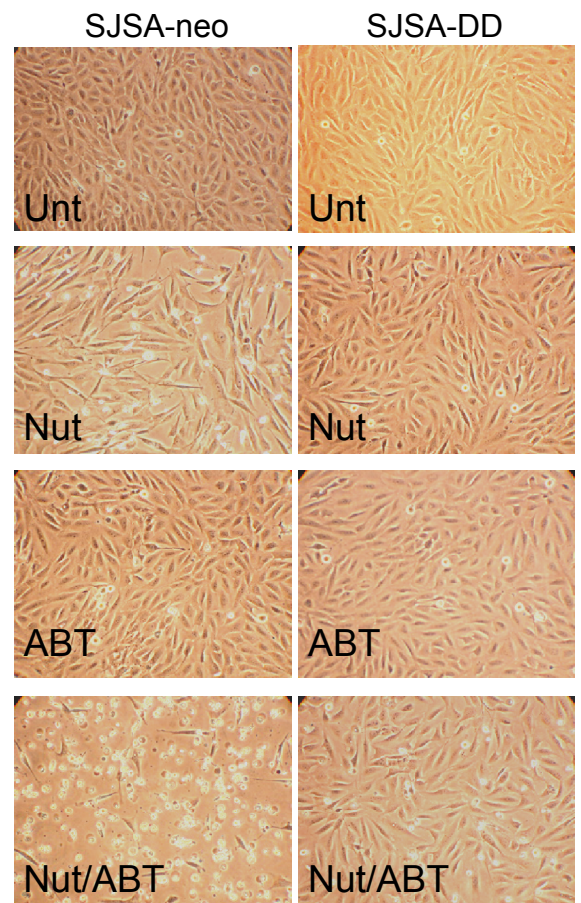

Wade et al  
Supplementary Figure 2 p53 dependence of Nutlin/ABT co-operation

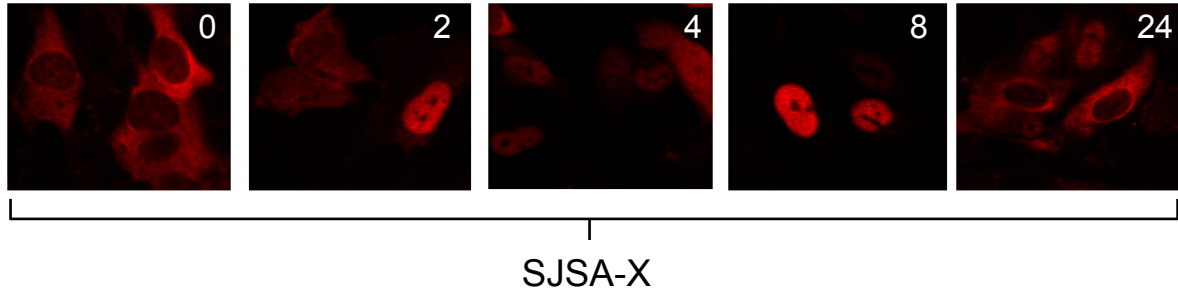

Wade et al  
 Supplementary Figure 3 Nuclear translocation of Hdmx in SJSA cells

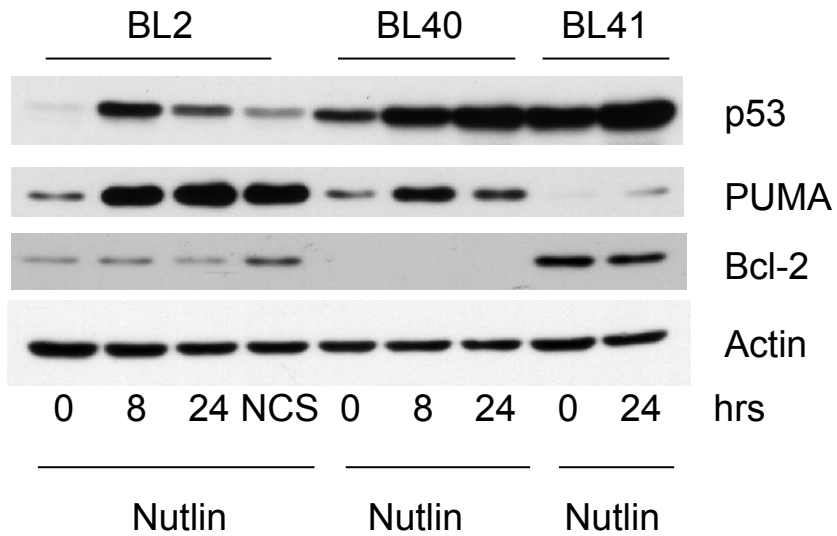

Wade et al  
 Supplementary Figure 4 Molecular Profiling of BL cells following Nutlin treatment

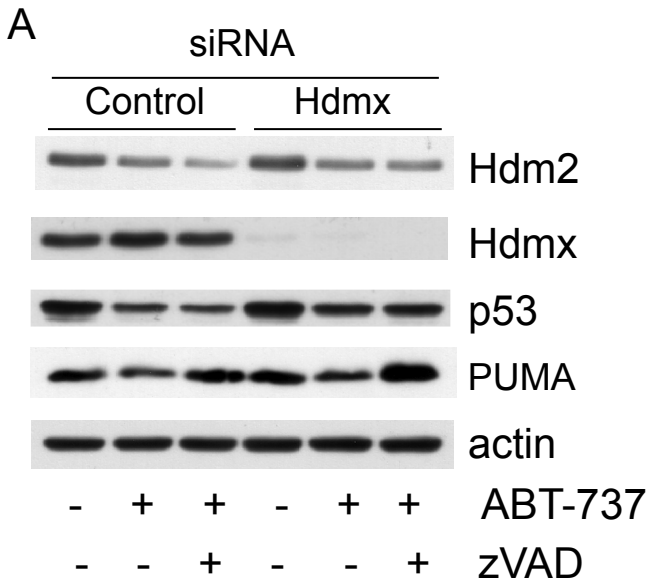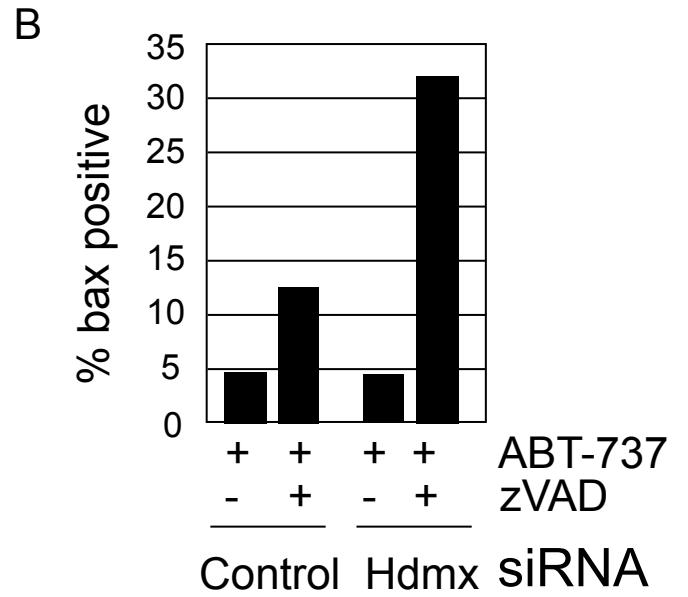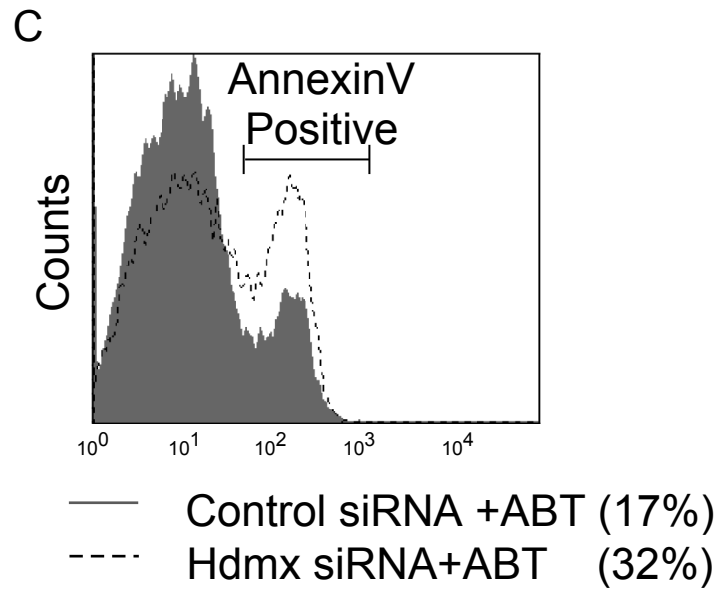

**Supplementary Table 1: Sequences of primers used in qRT-PCR**

| <b>Gene Name</b> | <b>Sequence for Forward</b> | <b>Sequence for Reverse</b>  |
|------------------|-----------------------------|------------------------------|
| FDXR             | GTACAACGGGCTTCCTGAGAAC      | CCCCAGAATCACGGCTGT           |
| PIG3             | AAATTCACCAAAGGTGCTGGAGT     | TCCGCCTATGCAGTCTAGAATAAGA    |
| P53DINP1         | AATGAGAAAGAAGATGATGAATGGATT | TGCTGAGAAACCAGTGCAAGTATC     |
| DR5              | TGTCGCCGCGGTCCT             | TGGGTGATCAGAGCAGACTCAG       |
| FAS              | GGGCATCTGGACCCTCCTAC        | GATAATCTAGCAACAGACGTAAGAACCA |
| GADD45A          | ATTCTCGGCTGGAGAGCAGA        | GCATCCCCCACCTTATCCAT         |
| PUMA (BBC3)      | ACGACCTCAACGCACAGTACG       | TCCCATGATGAGATTGTACAGGAC     |
| P21 (CDK1N1A)    | CTGGAGACTCTCAGGGTTCGAAA     | GATTAGGGCTTCCTCTTGGAGAA      |
| MDM2             | GGCGATTGGAGGGTAGACCT        | CACATTTGCCTGGATCAGCA         |

**Supplementary Table 2: Quantification of G1 and G2/M phases of cell cycle from FACS profiles in Fig.6**

| <b>WS1</b>        | <b>G1</b> | <b>G2/M</b> |
|-------------------|-----------|-------------|
| <b>Unt</b>        | 78%       | 15%         |
| <b>Nut</b>        | 64%       | 23%         |
| <b>ABT 1</b>      | 75%       | 13%         |
| <b>ABT 10</b>     | 74%       | 11%         |
| <b>Nut/ABT 1</b>  | 63%       | 24%         |
| <b>Nut/ABT 10</b> | 63%       | 22%         |
| <b>MCF7</b>       | <b>G1</b> | <b>G2/M</b> |
| <b>Unt</b>        | 62%       | 23%         |
| <b>Nut</b>        | 70%       | 14%         |
| <b>ABT 1</b>      | 62%       | 22%         |
| <b>ABT 10</b>     | 67%       | 10%         |
| <b>Nut/ABT 1</b>  | 61%       | 10%         |
| <b>Nut/ABT 10</b> | 38%       | 7%          |
